# Supplementary material for: An In Vitro Examination of Whether Kratom Extracts Enhance the Cytotoxicity of Low-Dose Doxorubicin against A549 Human Lung Cancer Cells
Source: MDPI journal article supplement (doi:10.3390/molecules29061404), 2024-03-21
Supplement: s1 [file s1]

## SUPPLEMENTARY INFORMATION

# An In Vitro Examination of Whether Kratom Extracts Enhance the Cytotoxicity of Low-Dose Doxorubicin against A549 Human Lung Cancer Cells

Asep Bayu <sup>1,\*</sup>, Siti Irma Rahmawati <sup>1</sup>, Firmansyah Karim <sup>1</sup>, Jonathan Ardhianto Panggabean <sup>1</sup>, Dasilva Primarindu Nuswantari <sup>1</sup>, Dwi Wahyu Indriani <sup>1</sup>, Peni Ahmadi <sup>1</sup>, Rendi Witular <sup>2</sup>, Ni Luh Putu Indi Dharmayanti <sup>3</sup> and Masteria Yunovilsa Putra <sup>1,\*</sup>

- <sup>1</sup> Research Center for Vaccine and Drugs, National Research and Innovation Agency (BRIN), Jalan Raya Jakarta-Bogor KM 46, Cibinong, Bogor 16911, Indonesia; siti.irma.rahmawati@brin.go.id (S.I.R.); firmansyahkarim93@gmail.com (F.K.); jonathanardhianto@gmail.com (J.A.P.); dasilvarindu@gmail.com (D.P.N.); dwiw007@brin.go.id (D.W.I.); peni.ahmadi@brin.go.id (P.A.)
- <sup>2</sup> Ministry of Health, Republic of Indonesia, Jalan HR Rasuna Said Blok X5 Kavling 4-9, Kuningan, South Jakarta 12950, Indonesia; rendyaw@yahoo.com
- <sup>3</sup> Research Organization for Health, National Research and Innovation Agency (BRIN), Jalan Raya Jakarta-Bogor KM. 46, Cibinong, Bogor 16911, Indonesia; nilu011@brin.go.id
- \* Correspondence: asepe044@brin.go.id (A.B.); masteria.yunovilsa.putra@brin.go.id (M.Y.P.)

**Table S1.** The color appearances and MG extraction

| Run | MG relative extraction (%) | Extract solution color                                                              |                                                                                       |
|-----|----------------------------|-------------------------------------------------------------------------------------|---------------------------------------------------------------------------------------|
|     |                            | 1 <sup>st</sup> run                                                                 | 5 <sup>th</sup> run                                                                   |
| 2   | 88                         | 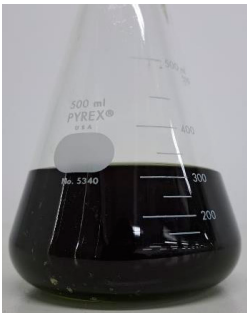 |  |
| 3   | 74                         |                                                                                     |                                                                                       |
| 4   | 16                         |                                                                                     |                                                                                       |
| 5   | n.d                        |                                                                                     |                                                                                       |

**Table S2.** Gradient program of eluent during HPLC analysis of Kratom's extracts

| Time (min)   | Mobile Phase A (%) | Mobile Phase B (%) |
|--------------|--------------------|--------------------|
| 0.01 – 4.00  | 70 → 30            | 30 → 70            |
| 4.01 – 6.00  | 30                 | 70                 |
| 6.01 – 8.00  | 30 → 70            | 70 → 30            |
| 8.01 – 20.00 | 70                 | 30                 |

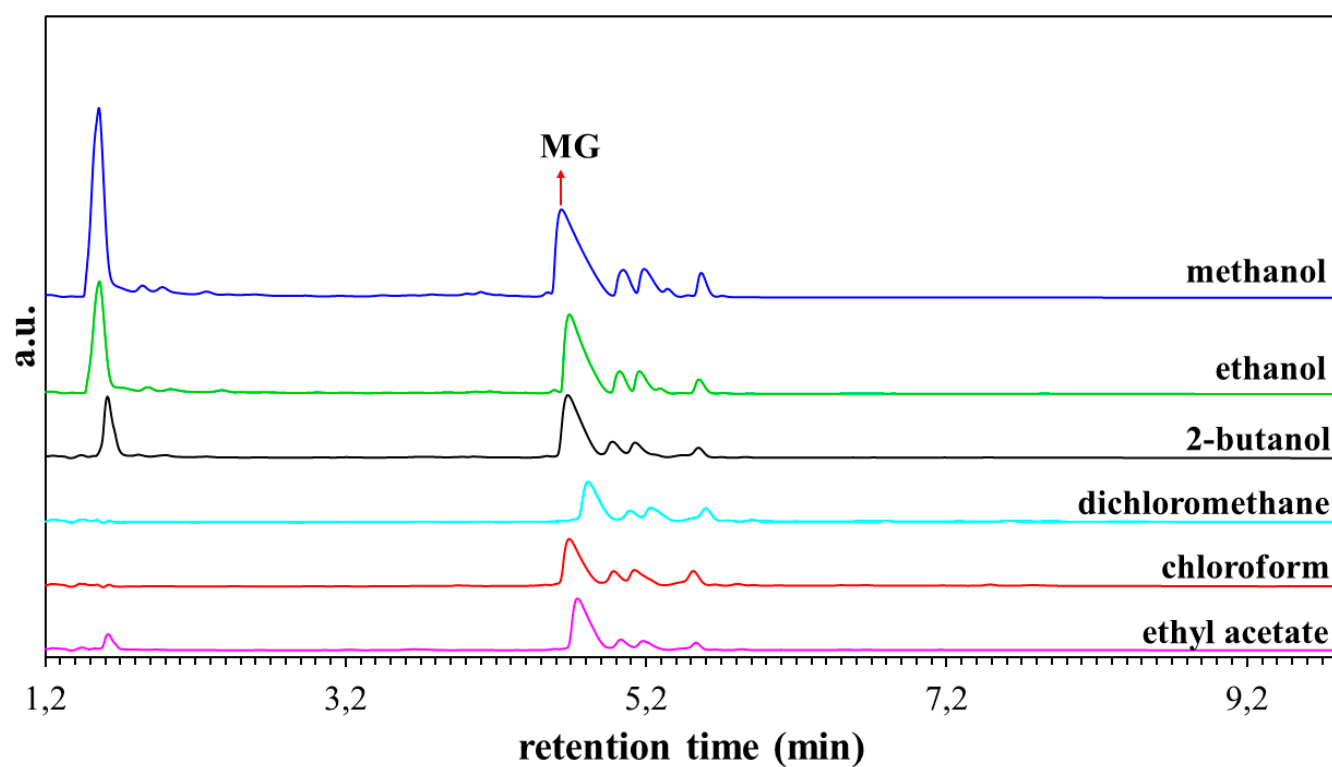

Figure S1. HPLC chromatograms of methanolic crude extracts solution obtained from different extraction solvents.

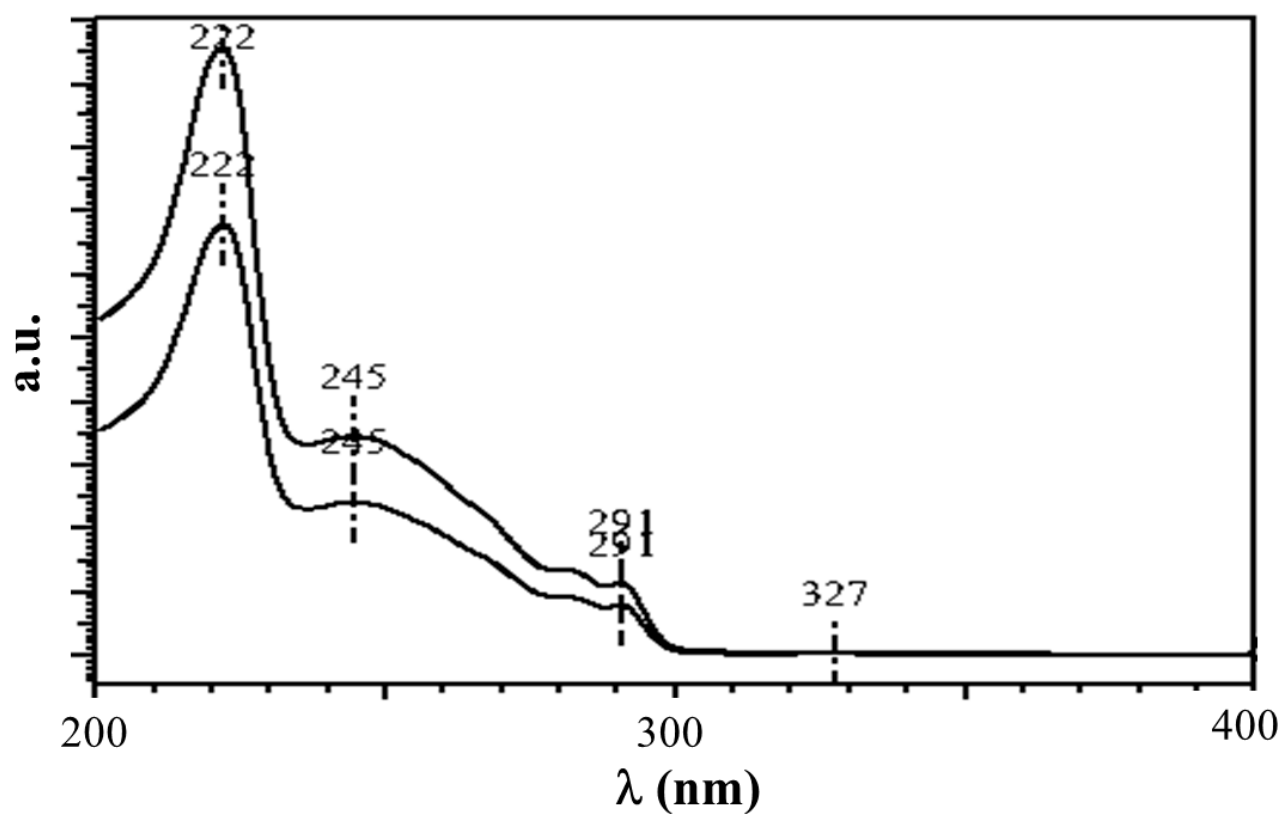

**Figure S2.** UV absorbance of MG peak in the alkaloid extract solution compared with MG peak of the standard solution.

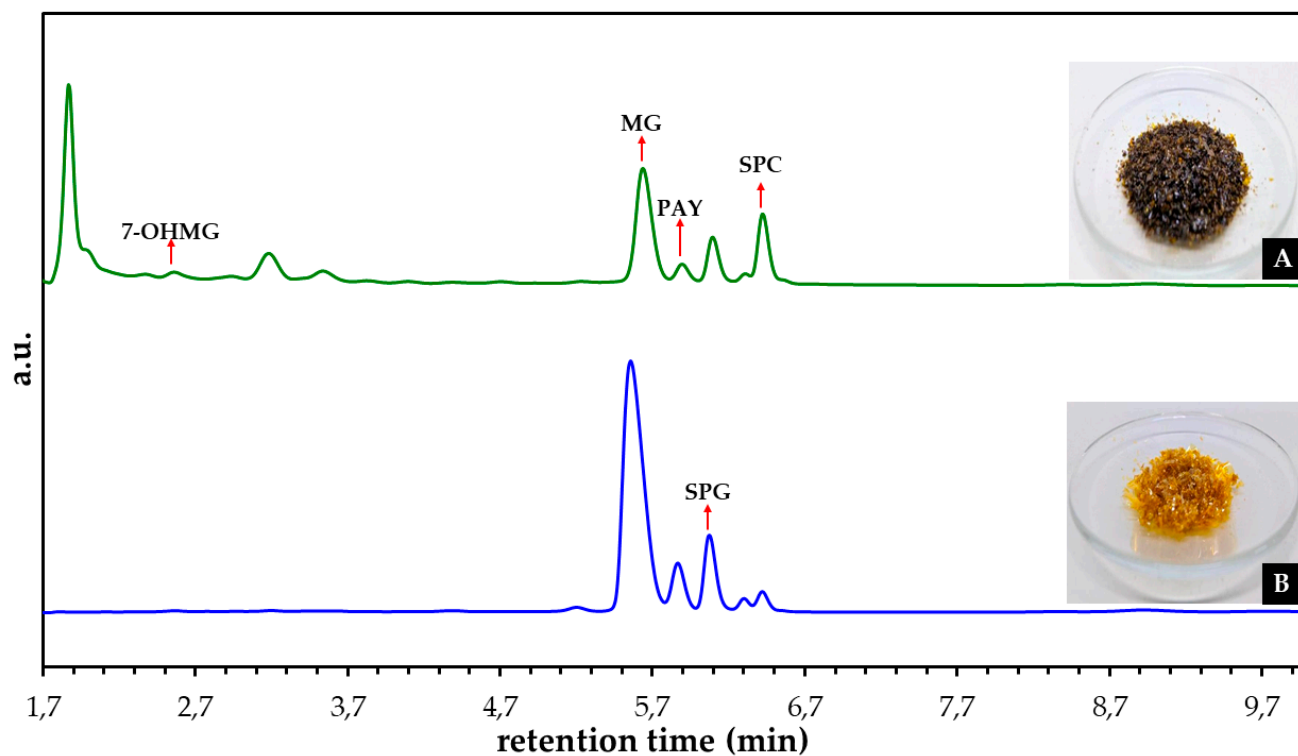

**Figure S3.** Typical HPLC chromatogram of the crude (A) and MG-rich alkaloid extract. 7-OHMG, MG, PAY, SPG, SPC, A, B, C refer to 7-hydroxymitragynine, mitragynine, paynantheine, speciogynine, speciociliatine, kratom leaves powder, crude extract and alkaloid extract, respectively.

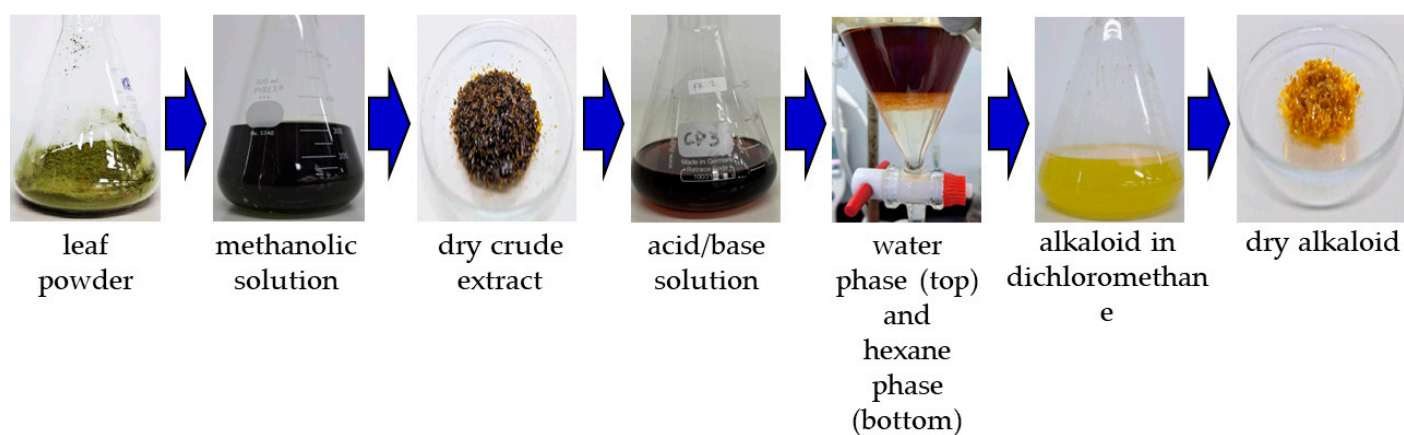

**Figure S4.** Physical changes of color appearances for each steps during serial extraction of kratom leaves powder using methanolic and acid/base treatments

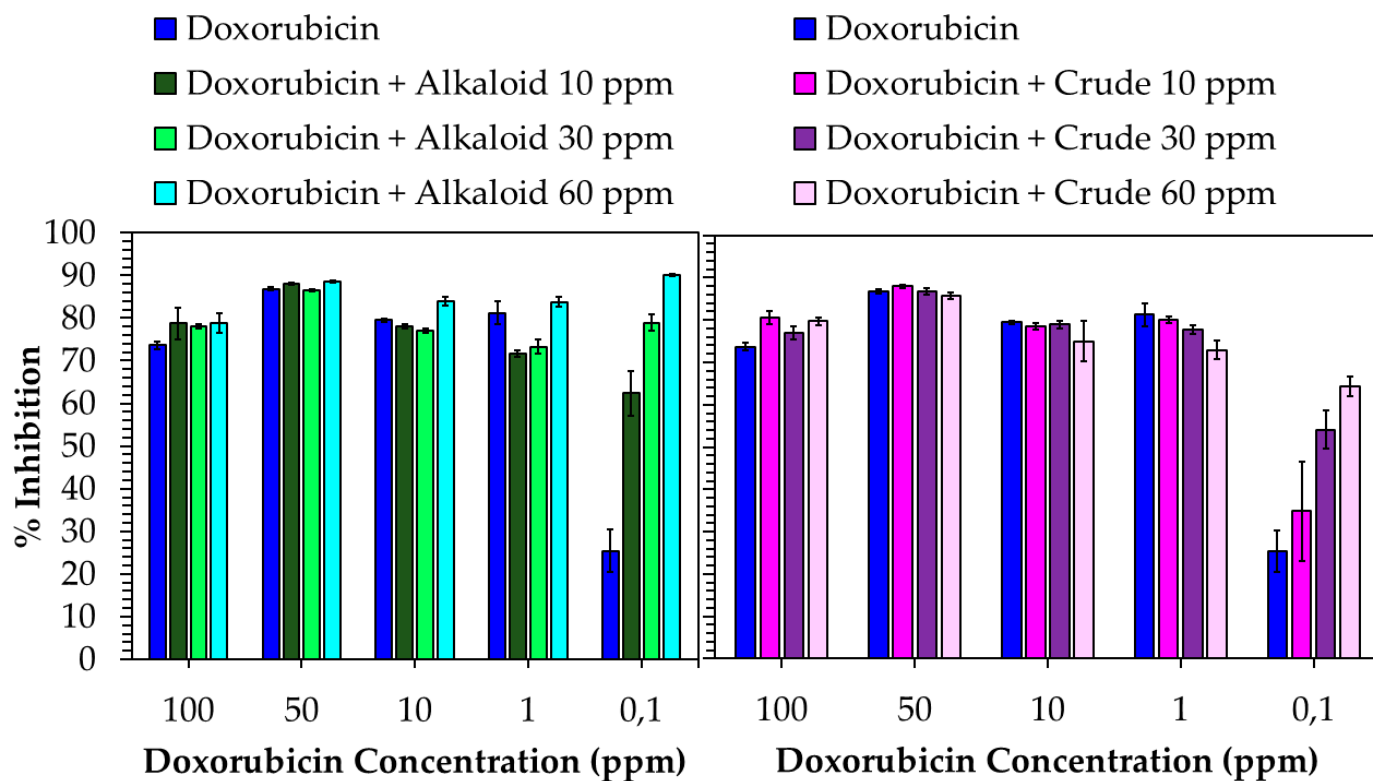

**Figure S5.** Cytotoxic activity of combination of doxorubicin and the Kratom extracts at several concentration against A549 human lung cancer cell lines.

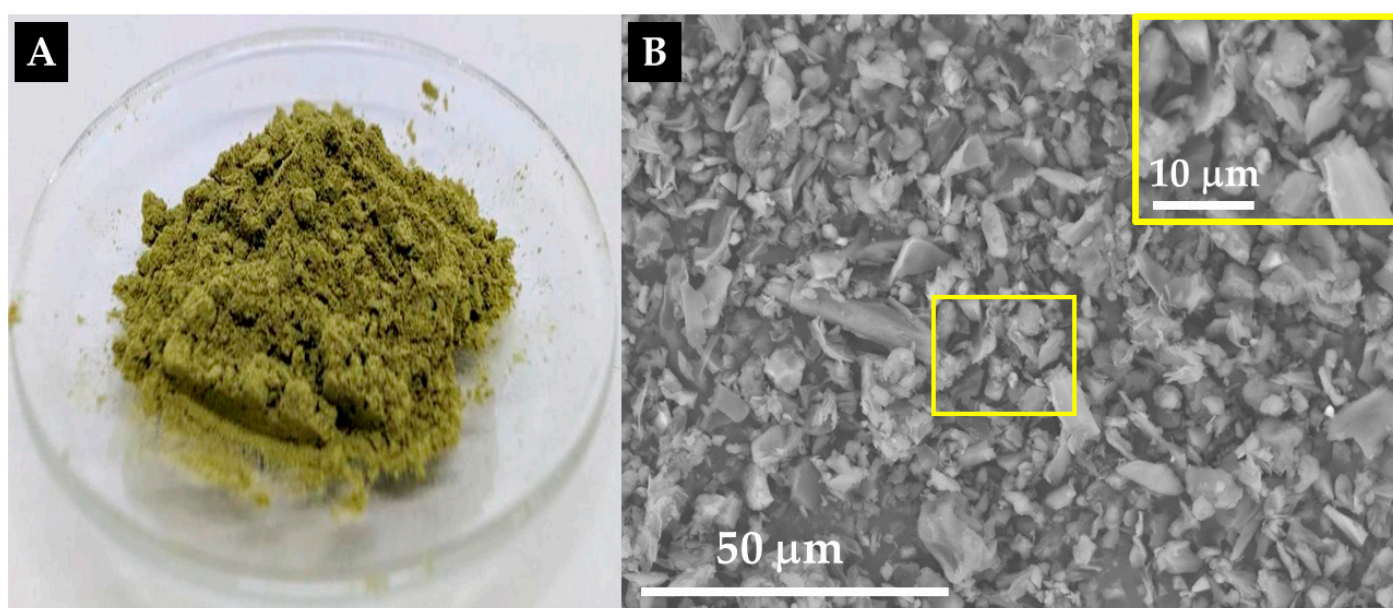

**Figure S6.** Physical appearances (A) and scanning electron microscopic image (B) of the kratom leaves powder.
